# Supplementary material for: Utilizing an ionic liquid for synthesizing a soft matter polymer “gel” electrolyte for high rate capability lithium-ion batteries
Source: Royal Society of Chemistry journal article supplement (doi:10.1039/c1jm12269j), 2011-01-01
Supplement: c1jm12269j.pdf [file c1jm12269j.pdf]

Supporting Information for Manuscript Entitled

**Utilizing an ionic liquid for synthesizing a soft matter polymer “gel”  
electrolyte for high rate capability lithium-ion batteries**

Monalisa Patel, M. Gnanavel and Aninda J. Bhattacharyya  
Solid State and Structural Chemistry Unit,  
Indian Institute of science, Bangalore 560012, India

Supporting information 1

*Synthesis of C/MWCNT-LiFePO<sub>4</sub> electrode materials:* Lithium iron phosphate coated with amorphous carbon (C-LFP) and with MWCNT (MWCNT-LFP) were synthesized essentially using a sol-gel method [1, 2]. For synthesis of MWCNT-LFP, 0.03 mol ferric citrate (C<sub>6</sub>H<sub>5</sub>FeO<sub>7</sub>, Sigma-Aldrich) was dissolved in water and then heated at 60 °C for 1 h (A). In another beaker an aqueous mixture of 0.02 mol phosphoric acid (H<sub>3</sub>PO<sub>4</sub>, Fisher Scientific) and 0.01 mol lithium phosphate (Li<sub>3</sub>PO<sub>4</sub>, Sigma-Aldrich) were heated at 70 °C for 1 h. This results in the formation of LiH<sub>2</sub>PO<sub>4</sub> in the aqueous solution (B). Mixtures (A) and (B) were mixed together at approximately 60 °C. To the resulting transparent sol, 0.5 % MWCNTs (diameter: (10-30) nm; purity > 90 %, M/s Sun Nanotech) of the total precursor weight (i.e. ferric citrate, lithium phosphate and phosphoric acid) were dispersed and the sol-MWCNT mixture was homogenized using a sonicator (approximately 2 min). The homogeneous mixture was again reheated at 60 °C for nearly 24 h. The green color product was ground thoroughly with an agate pestle and mortar and annealed under argon atmosphere at 700 °C for 10 h (heating rate of 3 °C min<sup>-1</sup>). For the synthesis of C-LFP exactly same procedure was followed but without the addition of MWCNTs.

*Electrode preparation and electrochemical characterization:* Room temperature (= 25 °C) galvanostatic charge and discharge cycling were carried out in Swagelok<sup>TM</sup> cells

with C/MWCNT-LFP and metallic Li (Aldrich) as cathode and anode, respectively. Whatman glass fiber separator soaked with 0.5 M LiTFSI-[Py<sub>1,4</sub>-TFSI] was used in between the electrodes. For polymer gel electrolytes no separator materials were used for sandwiching the electrolyte between the electrodes. The cells were assembled inside an argon-filled glove-box (MBraun, H<sub>2</sub>O: < 0.1 ppm) and the voltage range for galvanostatic cycling was 2.0-3.8 V. The composite C/MWCNT-LFP electrode was prepared by mixing C-LFP or (0.5%)MWCNT-LFP, carbon black (Alfa Aesar) and poly (vinyl difluoride) (PVDF, Kynarfex) in the ratio of 85:8:7 (by w/w) in *N*-methyl-pyrrolidone (NMP). The slurry was cast on Al foil (Alfa Aesar, thickness= 0.1 mm) and dried in a vacuum oven at 120 °C overnight.

## References

1. R. Dominko, M. Bele, M. Gaberscek, M. Remskar, D. Hanzel, J. M. Gupil, S. Pejovnik, J. Jamnik, *J. Power. Sources*, **153**, 274 (2006).
2. M. Gaberscek, R. Dominko, M. Bele, M. Remskar, D. Hanzel, J. Jamnik, *Solid State Ionics.*, **176**, 1801 (2005).
